# Supplementary material
Source: PubMed Central journal article supplement (PMC6125188)
Supplement: NIHMS1500074-supplement-1.pdf [file NIHMS1500074-supplement-1.pdf]

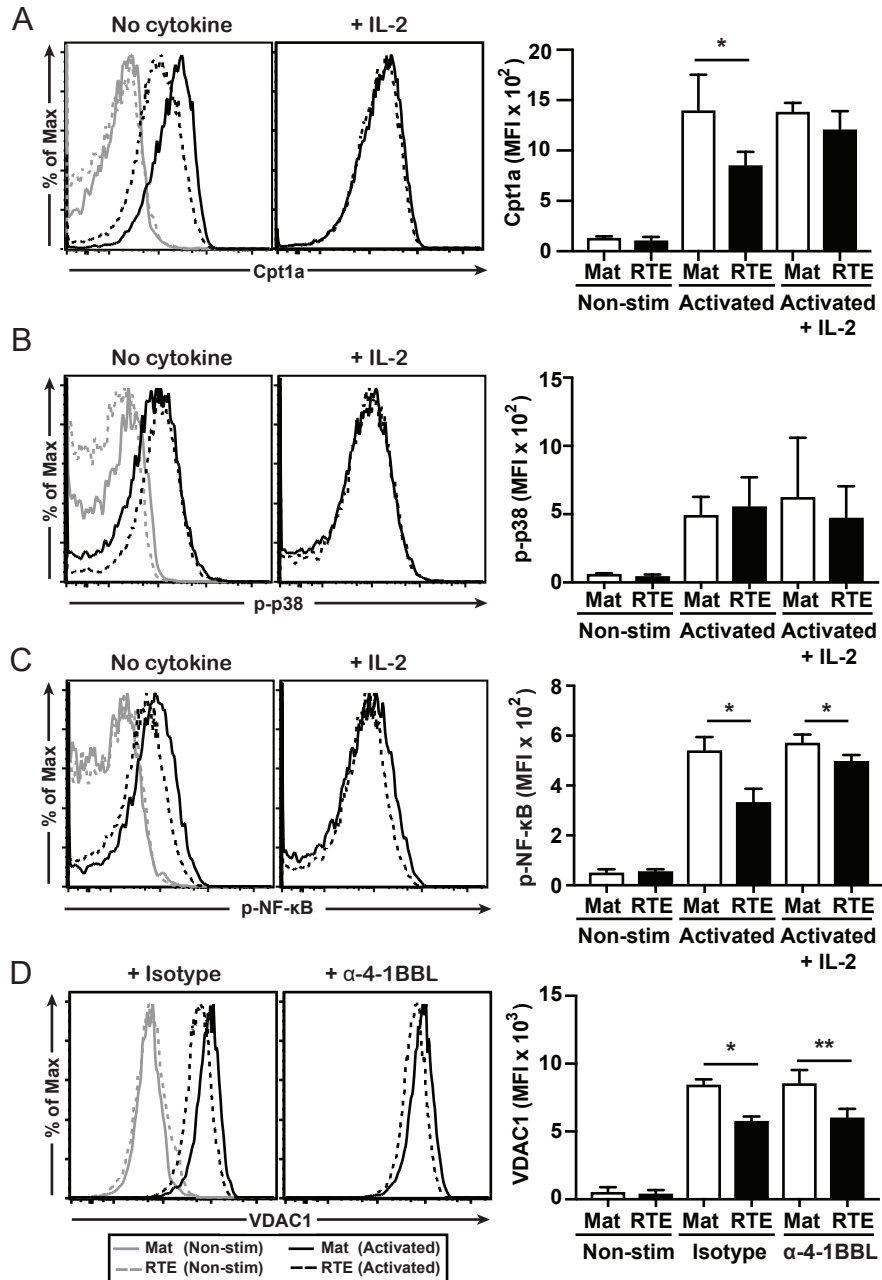

**Supplemental Figure 1. Cpt1a and 4-1BB signaling are dispensable for the mitochondrial phenotype of RTEs** (A) Sort-purified CD8<sup>+</sup> RTEs and MN T cells were freshly isolated (non-stim) or stimulated with Ag  $\pm$  IL-2 in vitro for 3 days and the expression level of intracellular Cpt1a (A), p-p38 (B), and p-NF- $\kappa$ B (C) determined; representative histograms are shown on the left. The bar graphs on the right depict the average MFI  $\pm$  SD from 3 independent experiments. (D) RTEs and MN T cells left unstimulated or activated in the presence of  $\alpha$ -4-1BBL or an isotype control (both at 10  $\mu$ g/mL) and VDAC1 levels determined; representative histograms are shown on the left. The bar graphs on the right depict the average MFI  $\pm$  SD from 3 independent experiments. \*p < 0.05 \*\* p < 0.01 by paired Student *t* test.

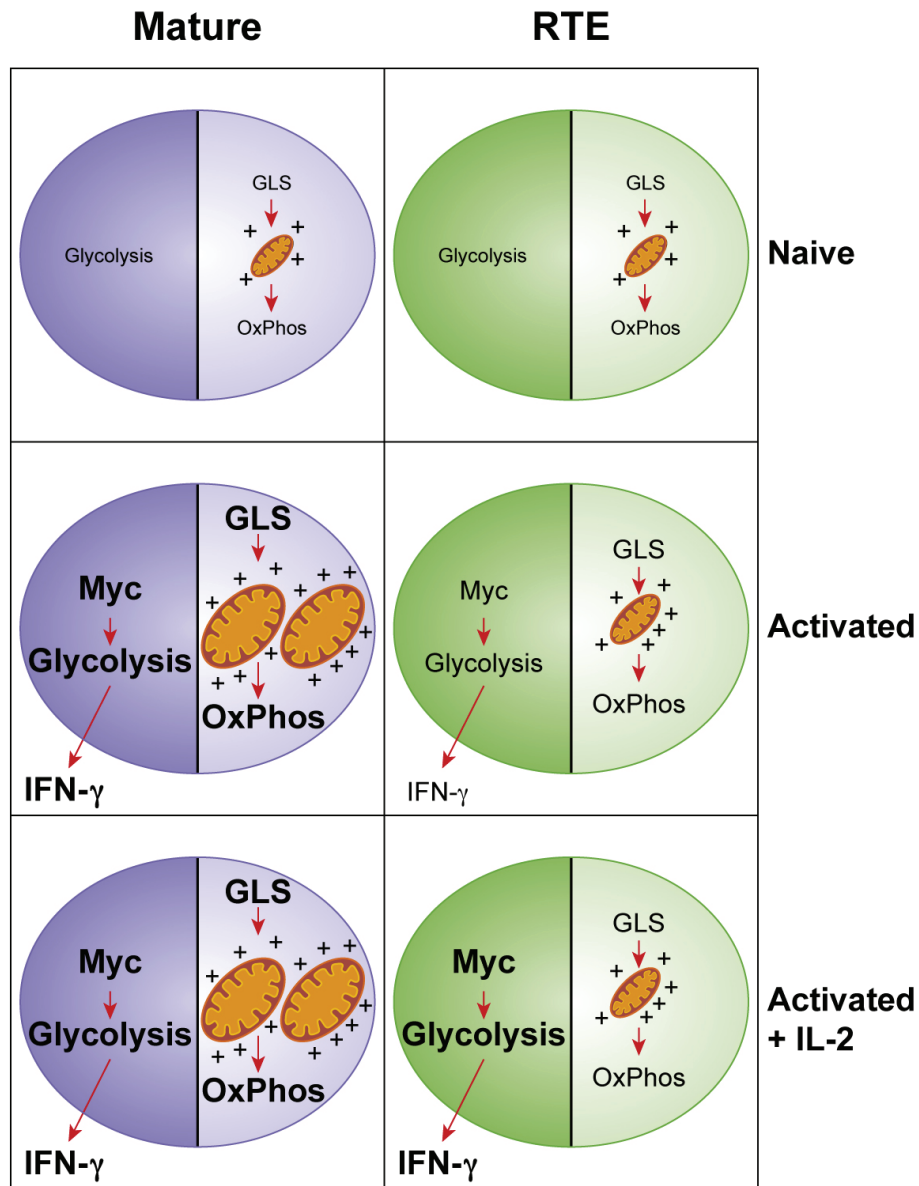

**Supplemental Figure 2. Altered metabolism in antigen-activated RTEs.** Resting RTEs and mature T cells have similar metabolic profiles (top panels). However, upon activation in the absence of exogenous IL-2 (middle panels), RTEs display defective aerobic glycolysis and glutamine-fueled OxPhos relative to mature T cells. When RTEs are activated in the presence of exogenous IL-2 (bottom panels), aerobic glycolysis (and thus IFN- $\gamma$  production) is restored. However, IL-2 fails to restore GLS expression and mitochondrial mass accumulation in RTEs.
